# Supplementary material for: A Search for SNCA 3′ UTR Variants Identified SNP rs356165 as a Determinant of Disease Risk and Onset Age in Parkinson’s Disease
Source: Springer Nature journal article supplement (doi:10.1007/s12031-011-9669-1), 2011-11-10
Supplement: MOESM2 [file 12031_2011_9669_MOESM2_ESM.doc]

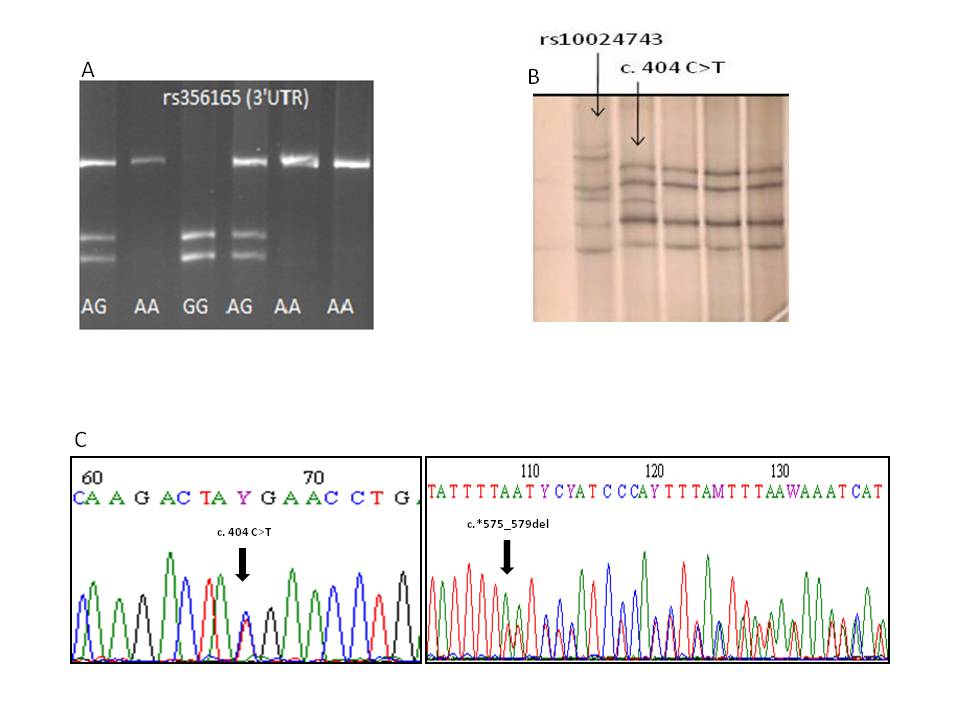


**Suppl. Figure 1. A: PCR-RFLP genotypes for the rs356165 SNP. B: SSCA patterns of heterozygotes (arrows) for the c.404 C>T and the c.*139 T>G (SNP rs10024743). C: DNA sequences showing the c.404 C>T and the c.*575_579 deletion.**
